# Supplementary material
Source: publisher figshare collection journal article supplement (https://tandf.figshare.com/ndownloader/files/13005155)
Supplement: Supplementary file 1 [file 13005155]

**Supplemental online material**

**Effect of the hydrophobicity of fumed silica particles and the nature of oil on the structure and rheological behavior of Pickering emulsions**


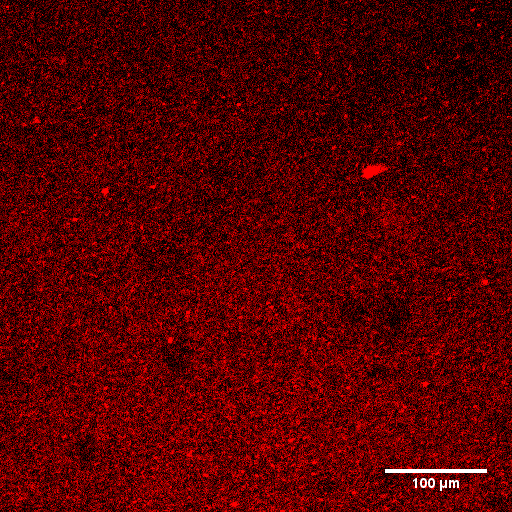

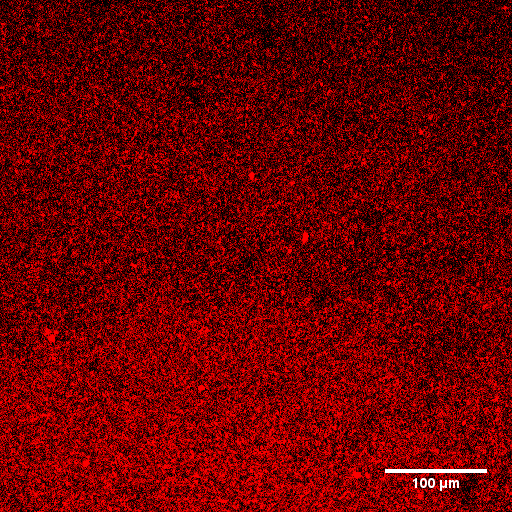


**Figure. SM1.** *CLSM images (500µm x 500µm) of 1% Aerosil® R816 dispersed in water.* Aerosil® 816 was the only particle able to be dispersed in water.

**Figure SM2.** *Elastic (G’) and viscous (G”) moduli as a function of frequency for 1% wt* Aerosil® R816 *particles dispersed in water.*

**Figure SM3.** *Yield stress values for suspensions of hydrophobic fumed silica particles at 1% wt dispersed in different oils.*
